# Supplementary material
Source: publisher figshare collection journal article supplement (https://acs.figshare.com/ndownloader/files/4714909)
Supplement: Supplementary file 1 [file 4714909]

*Version 1 of February 3, 2007  
Submitted to JACS*

## **Supporting Information**

### **Engineering Hydrogen-Bonded Molecular Crystals Built from Derivatives of Hexaphenylbenzene and Related Compounds**

Kenneth E. Maly, Eric Gagnon, Thierry Maris, and  
James D. Wuest\*

*Département de Chimie, Université de Montréal  
Montréal, Québec H3C 3J7 Canada*

#### **Contents**

|              |                                                                            |                  |
|--------------|----------------------------------------------------------------------------|------------------|
| <b>I.</b>    | <b>General X-Ray Crystallographic Information .....</b>                    | <b>(S3)</b>      |
| <b>II.</b>   | <b>Crystal Structure of Tecton 4 Grown from DMSO/THF .....</b>             | <b>(S4-S5)</b>   |
| <b>III.</b>  | <b>Crystal Structure of Tecton 4 Grown from DMSO/Toluene .....</b>         | <b>(S6-S8)</b>   |
| <b>IV.</b>   | <b>Crystal Structure of Tecton 4 Grown from DMSO/Benzene .....</b>         | <b>(S9-S10)</b>  |
| <b>V.</b>    | <b>Crystal Structure of Tecton 4 Grown from Formic Acid/Methanol .....</b> | <b>(S11-S15)</b> |
| <b>VI.</b>   | <b>Crystal Structure of Tecton 6 Grown from DMSO/Acetone .....</b>         | <b>(S16-S17)</b> |
| <b>VII.</b>  | <b>Crystal Structure of Tecton 5 Grown from DMSO/Acetonitrile .....</b>    | <b>(S18)</b>     |
| <b>VIII.</b> | <b>Crystal Structure of Tecton 7 Grown from DMSO/Methanol .....</b>        | <b>(S19-S20)</b> |
| <b>IX.</b>   | <b>Crystal Structure of Tecton 7 Grown from DMSO/Dioxane .....</b>         | <b>(S21)</b>     |
| <b>X.</b>    | <b>Crystal Structure of Tecton 8 Grown from DMSO/Acetone .....</b>         | <b>(S22)</b>     |

|             |                                                      |              |
|-------------|------------------------------------------------------|--------------|
| <b>XI.</b>  | <b>Torsional Angles in 2-Phenylpyrimidines .....</b> | <b>(S23)</b> |
| <b>XII.</b> | <b>References.....</b>                               | <b>(S24)</b> |

## General X-Ray Crystallographic Information

Each crystal was taken from a pool of Fluorolube/Paratone oil, mounted on a nylon loop fiber, and immediately placed under a cold stream of N<sub>2</sub> on a Bruker AXS diffractometer. The radiation used was Cu K $\alpha$  radiation ( $\lambda = 1.54178$  Å) produced from a FR591 rotating anode generator equipped with MONTEL 200 or HELIOS optics. The lattice parameters were optimized from a least-squares calculation on carefully centered reflections. Lattice determination and data collection were carried out using SMART Version 5.630 software.<sup>1</sup> Data reduction was performed using SAINT Version 7.01 software.<sup>2</sup> The structure refinement was performed using SHELXL.<sup>3</sup> The data were corrected for absorption using the SADABS program within the SHELXTL 6.14 software package.<sup>4,5</sup>

Each structure was solved using direct methods. This procedure yielded the heavy atoms, along with a number of the C, N, and O atoms. Subsequent Fourier synthesis yielded the remaining atom positions. The hydrogen atoms were fixed in positions of ideal geometry and refined within the SHELXL software.<sup>3</sup> These idealized hydrogen atoms had their isotropic temperature factors fixed at 1.2 or 1.5 times the equivalent isotropic  $U$  of the atoms to which they were bonded. The final refinement of each compound usually included anisotropic thermal parameters on all non-hydrogen atoms. All CIF files were checked for errors using the free on-line Checkcif service provided by the International Union of Crystallography (<http://www.iucr.org/acs/checkcif.html>).

In the case of crystals of tecton **4** grown from DMSO/THF, a problem of low data completeness was encountered. This is due to the fact that in the current geometry of the Proteum diffractometer used for data collection, the detector is partly masked by the video microscope, and a sample-changing robot limits access to the detector at high positive  $\theta$ . Under these conditions, data sets can be fully collected only up to  $\theta = 67$  degrees ( $\sin\theta/\lambda = 0.598$ ). As a result, data completeness can be rather low, especially when the crystal system is triclinic. The reported completeness and  $2\theta$  values have been maximized by using a special data-collection strategy employing two different crystal-to-detector distances and the collection of all accessible data.

For some weakly diffracting samples, useful data were collected only up to  $50$ – $55^\circ$  in  $2\theta$  because diffraction at higher angles was not visible, a feature mainly explained by the large disordered solvent content in these systems. This explains also the observed high values for  $R_1$  and  $wR_2$  in certain cases. Any high shift-to-error ratios encountered were lowered by performing further cycles of refinement. Any other problematic aspects of the structural solutions are discussed in the following sections.

## Crystal Structure of Tecton 4 Grown from DMSO/THF

**Table S1.** Bond lengths [Å] and angles [°] related to the hydrogen bonding observed in crystals of tecton **4** grown from DMSO/THF.

| D-H          | ..A       | d(D-H) | d(H..A) | d(D..A)   | <DHA  |
|--------------|-----------|--------|---------|-----------|-------|
| N(13)-H(13B) | O(140)    | 0.88   | 2.11    | 2.976(9)  | 167   |
| N(13)-H(13A) | O(160)#1  | 0.88   | 2.18    | 3.030(8)  | 162   |
| N(14)-H(14A) | O(160)#2  | 0.88   | 2.10    | 2.814(9)  | 137.8 |
| N(14)-H(14B) | N(12)#3   | 0.88   | 2.10    | 2.972(6)  | 169.5 |
| N(23)-H(23A) | N(52)#4   | 0.88   | 2.14    | 3.012(6)  | 169.4 |
| N(23)-H(23B) | O(150)#5  | 0.88   | 2.19    | 2.845(9)  | 131.3 |
| N(24)-H(24A) | O(302)#4  | 0.88   | 2.07    | 2.929(9)  | 165.4 |
| N(24)-H(24B) | O(183)    | 0.88   | 2.07    | 2.943(8)  | 171.7 |
| N(33)-H(33A) | O(100)    | 0.88   | 2.21    | 2.874(6)  | 131.4 |
| N(33)-H(33B) | N(32)#6   | 0.88   | 2.13    | 3.003(5)  | 172.6 |
| N(34)-H(34A) | O(100)#6  | 0.88   | 2.10    | 2.966(5)  | 167.3 |
| N(34)-H(34B) | N(61)#7   | 0.88   | 2.42    | 3.181(7)  | 144.8 |
| N(43)-H(43A) | N(42)#8   | 0.88   | 2.09    | 2.965(6)  | 178.8 |
| N(43)-H(43B) | O(300)#8  | 0.88   | 2.35    | 2.993(14) | 130.4 |
| N(44)-H(44B) | O(300)    | 0.88   | 2.29    | 3.098(13) | 152.5 |
| N(53)-H(53A) | O(150)#9  | 0.88   | 2.10    | 2.966(8)  | 166   |
| N(53)-H(53B) | O(301)    | 0.88   | 2.21    | 3.075(8)  | 169.2 |
| N(54)-H(54A) | N(22)#10  | 0.88   | 2.09    | 2.965(6)  | 175.9 |
| N(54)-H(54B) | O(302)    | 0.88   | 2.25    | 2.90(1)   | 131   |
| N(63)-H(63A) | O(110)    | 0.88   | 2.24    | 2.921(7)  | 134.5 |
| N(63)-H(63B) | N(62)#11  | 0.88   | 2.12    | 2.986(5)  | 169.5 |
| N(64)-H(64A) | O(110)#11 | 0.88   | 2.14    | 2.963(5)  | 156.2 |
| N(64)-H(64B) | N(31)#9   | 0.88   | 2.47    | 3.229(6)  | 144.8 |

Symmetry transformations used to generate equivalent atoms:

|                   |                   |                   |
|-------------------|-------------------|-------------------|
| #1 -x+1,-y+1,-z+2 | #2 x,y+1,z+1      | #3 -x+1,-y+2,-z+3 |
| #4 x+1,y,z+1      | #5 x,y,z+1        | #6 -x+2,-y+1,-z+2 |
| #7 x+1,y,z        | #8 -x+1,-y+1,-z+1 | #9 x-1,y,z        |
| #10 x-1,y,z-1     | #11 -x,-y+2,-z+2  |                   |

## Crystal Structure of Tecton 4 Grown from DMSO/Toluene

The selected crystal diffracted weakly (only 47% of observed reflections), and useful data were collected up to  $\theta = 53^\circ$  only. The structure was solved with direct methods in the triclinic space group P-1. Only DMSO and water molecules were found in the cavities. These solvent molecules were refined using similarity and distance restraints. Hydrogen atoms of the water molecules could not be located, but the final structure was reported with a chemical formula that includes these hydrogen atoms.

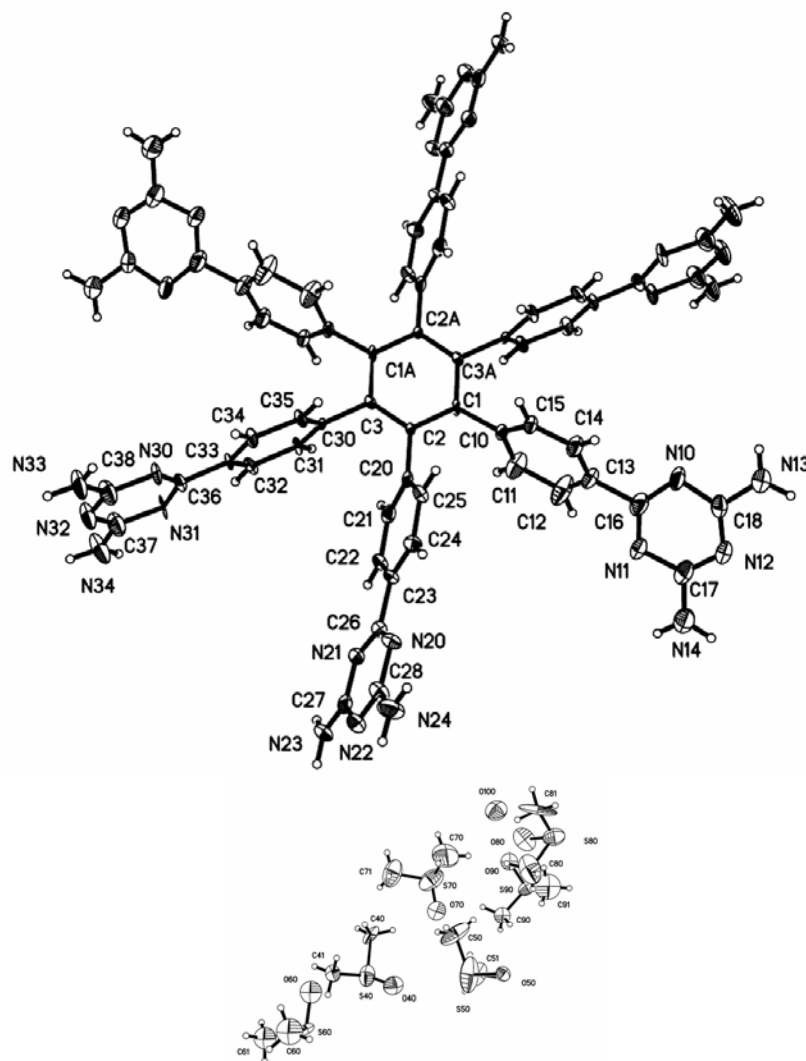

**Figure S2.** ORTEP view of the structure of crystals of tecton **4** grown from DMSO/toluene, with the numbering scheme adopted for the asymmetric unit. Ellipsoids are drawn at the 30% probability level. Hydrogen atoms are represented by a sphere of arbitrary size. Only one part of the disordered solvent molecules is shown.

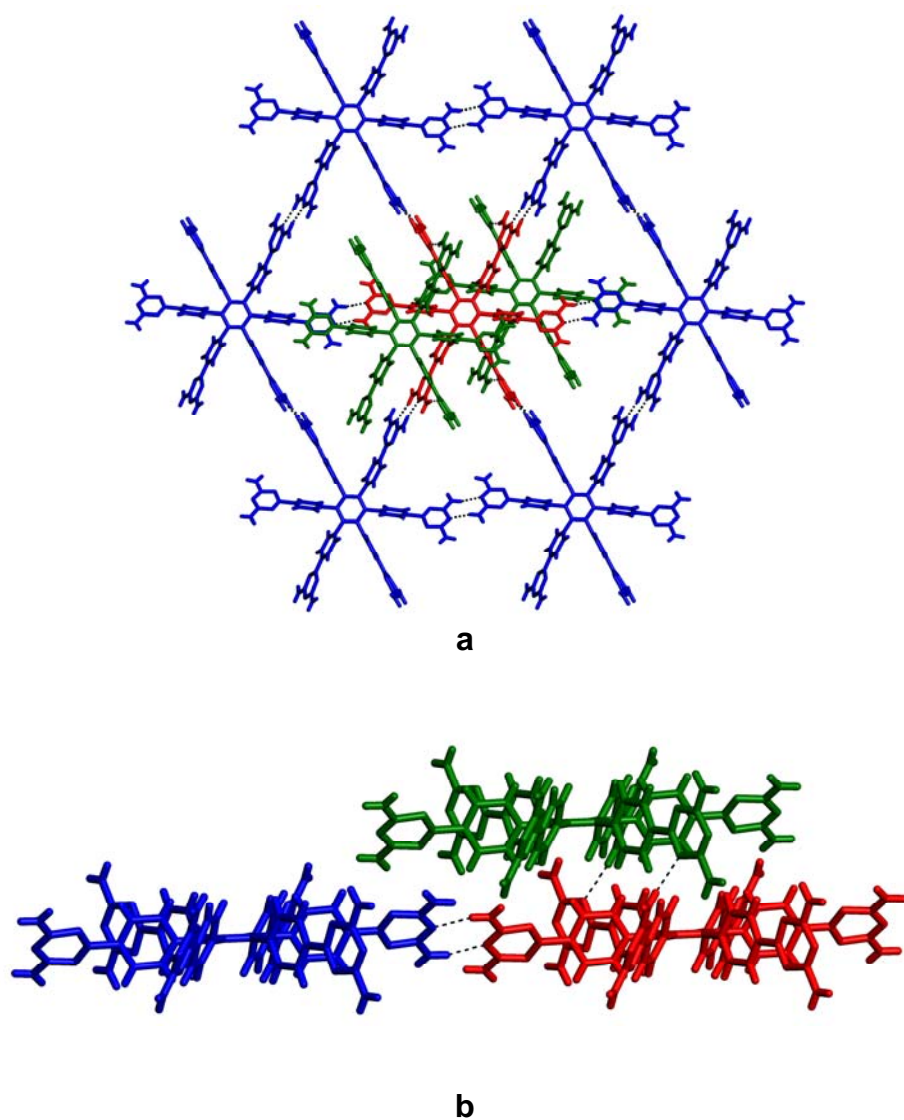

**Figure S3.** (a) View of the structure of crystals of tecton **4** grown from DMSO/toluene, showing a central tecton (red) and its eight hydrogen-bonded neighbors (blue and green). Six of the neighbors (blue) interact according to motif **I** and lie approximately in the plane of the central molecule, and the other two (green) lie above and below the plane. (b) Side view showing the central molecule (red), one of the coplanar neighbors (blue), and one of the neighbors in an adjacent sheet (green). In both views, guests are omitted for clarity, and hydrogen bonds are represented by broken lines.

**Table S2.** Bond lengths [ $\text{\AA}$ ] and angles [ $^\circ$ ] related to the hydrogen bonding observed in crystals of tecton **4** grown from DMSO/toluene.

| D-H      | ..A    | d(D-H) | d(H..A) | d(D..A)   | <DHA  |
|----------|--------|--------|---------|-----------|-------|
| N13-H13A | O100#2 | 0.88   | 2.17    | 2.997(11) | 155.9 |
| N13-H13B | O70#3  | 0.88   | 2.16    | 2.997(11) | 160.2 |
| N14-H14A | N12#2  | 0.88   | 2.20    | 3.052(11) | 161.6 |
| N14-H14B | O90    | 0.88   | 2.30    | 3.088(11) | 148.0 |
| N23-H23A | O50#4  | 0.88   | 2.07    | 2.934(11) | 167.2 |
| N23-H23B | N30#5  | 0.88   | 2.19    | 3.035(11) | 160.8 |
| N24-H241 | N22#4  | 0.88   | 2.16    | 3.029(11) | 170.8 |
| N24-H242 | O50    | 0.88   | 2.15    | 2.791(11) | 129.0 |
| N33-H33A | N32#6  | 0.88   | 2.07    | 2.936(11) | 170.3 |
| N34-H34B | O40#7  | 0.88   | 2.38    | 3.198(11) | 155.8 |

Symmetry transformations used to generate equivalent atoms:

|                   |               |                   |
|-------------------|---------------|-------------------|
| #1 -x+2,-y+2,-z   | #2 -x,-y+1,-z | #3 -x+1,-y+1,-z   |
| #4 -x+1,-y+2,-z+1 | #5 x-1,y,z    | #6 -x+3,-y+3,-z+1 |
| #7 x,y+1,z        |               |                   |



## Crystal Structure of Tecton 4 Grown from DMSO/Benzene

The structure was solved in the trigonal space group  $R\bar{3}$  using direct methods. The selected crystal diffracted weakly. The arm of the molecule is statistically disordered between two positions. Only one DMSO molecule (linked by hydrogen bonding to compound **4**) and one benzene molecule were located. The contribution of the remaining solvent was treated using the SQUEEZE option in PLATON.<sup>6</sup>

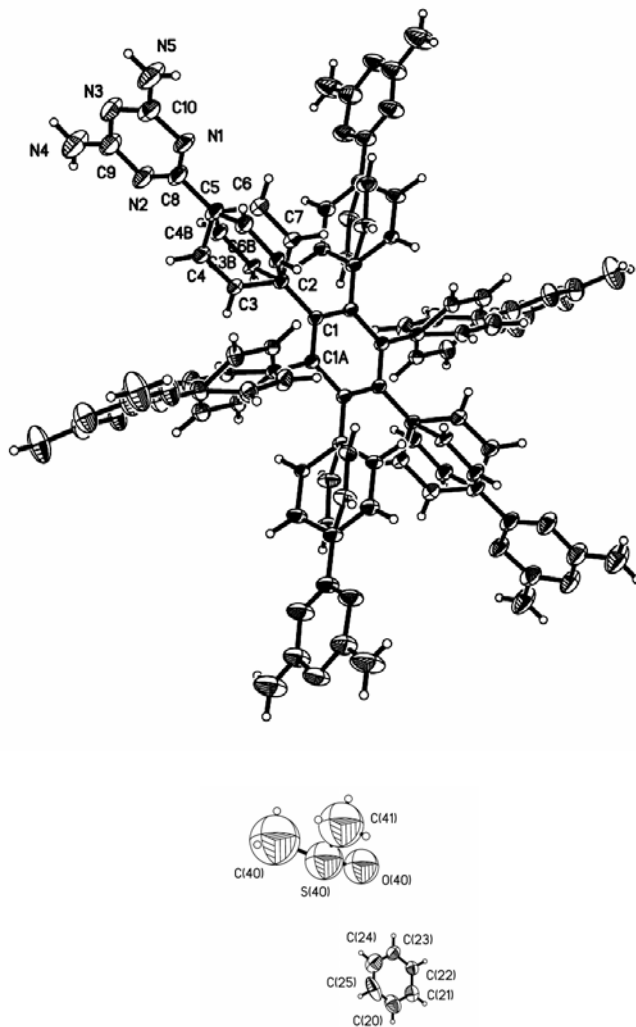

**Figure S4.** ORTEP view of the structure of crystals of tecton **4** grown from DMSO/benzene, with the numbering scheme adopted for the asymmetric unit. Ellipsoids are drawn at the 30% probability level. Hydrogen atoms are represented by a sphere of arbitrary size. Only one part of the disordered solvent molecules is shown.

**Table S3.** Bond lengths [ $\text{\AA}$ ] and angles [ $^\circ$ ] related to the hydrogen bonding observed in crystals of tecton **4** grown from DMSO/benzene.

| D-H        | ..A     | d(D-H) | d(H..A) | d(D..A)    | <DHA  |
|------------|---------|--------|---------|------------|-------|
| N(4)-H(4A) | N(3)#3  | 0.88   | 2.02    | 2.8990(19) | 173.3 |
| N(4)-H(4C) | O(40)   | 0.88   | 2.22    | 2.908(3)   | 135.3 |
| N(5)-H(5A) | O(40)#4 | 0.88   | 2.14    | 2.944(3)   | 150.8 |
| N(5)-H(5B) | O(40)#3 | 0.88   | 2.37    | 3.193(3)   | 155   |

Symmetry transformations used to generate equivalent atoms:

|                             |                     |
|-----------------------------|---------------------|
| #1 $y+1, -x+y+1, -z+1$      | #2 $x-y, x-1, -z+1$ |
| #3 $-x+5/3, -y+1/3, -z+4/3$ | #4 $x, y, z-1$      |

## Crystal Structure of Tecton 4 Grown from Formic Acid/Methanol

The structure was solved in the trigonal space group  $R\bar{3}$  using direct methods. The crystal examined was found to be twinned. In addition, it diffracted weakly, and useful data could be collected only up to  $\theta = 53.34^\circ$ . The solvent molecules were not clearly located and identified. There were modeled using the PLATON/SQUEEZE program,<sup>6</sup> which located a large void with a total potential volume of  $4345 \text{ \AA}^3$  and electron count of 963.

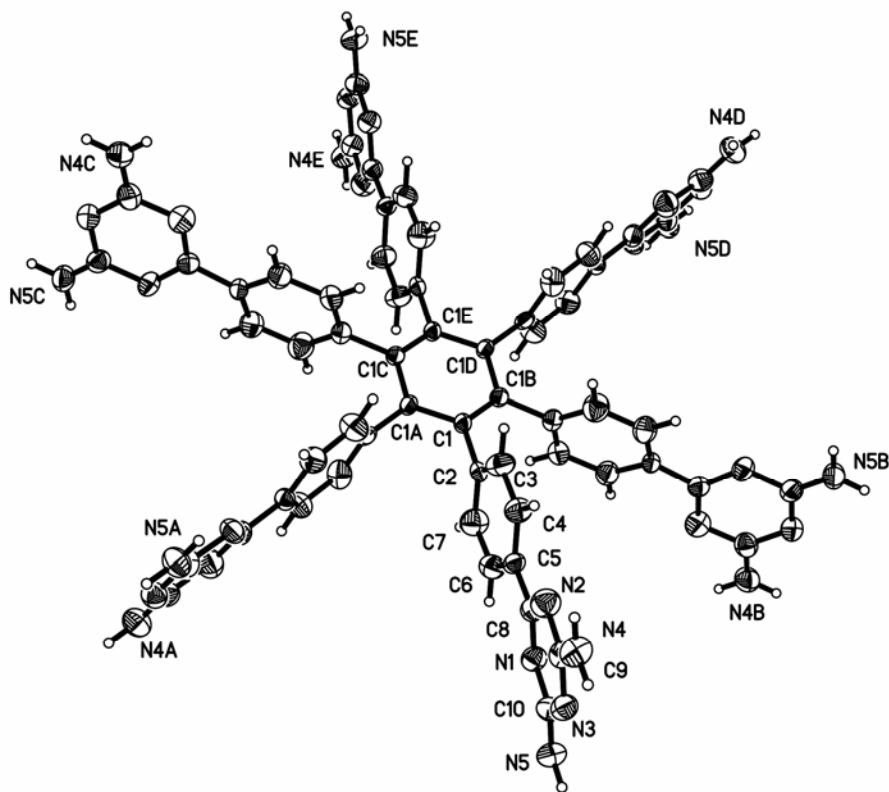

**Figure S5.** ORTEP view of the structure of crystals of tecton **4** grown from formic acid/methanol, with the numbering scheme adopted for the asymmetric unit. Ellipsoids are drawn at the 30% probability level. Hydrogen atoms are represented by a sphere of arbitrary size.

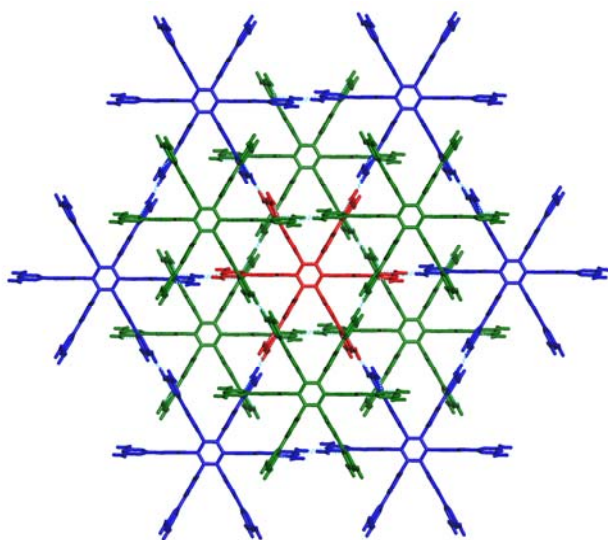**a**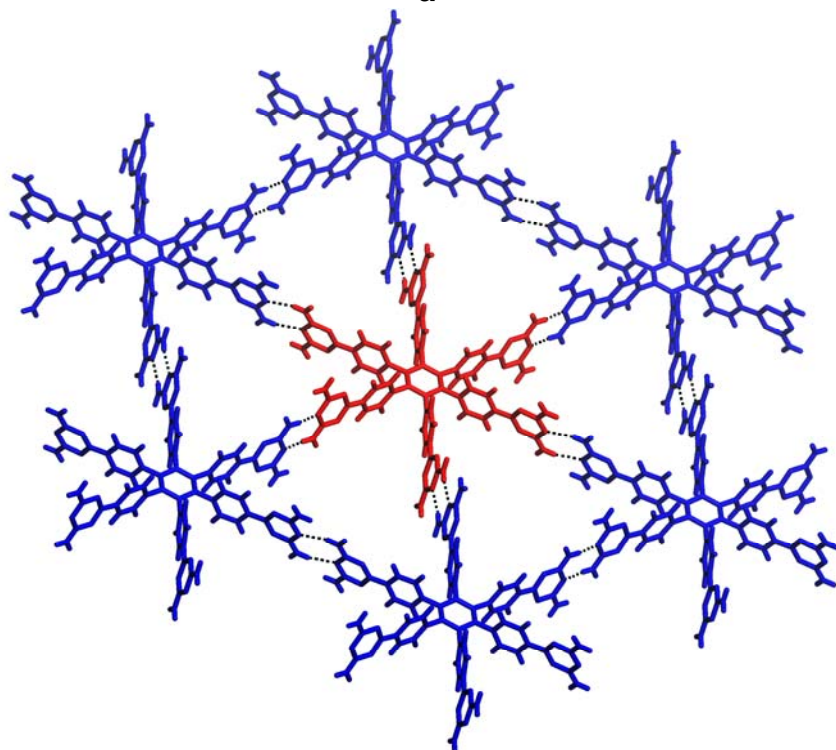**b**

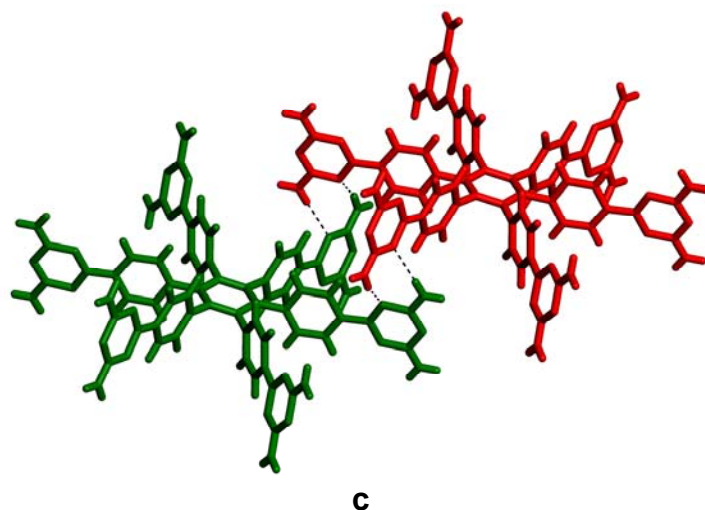

**Figure S6.** (a) View of the structure of crystals of tecton **4** grown from formic acid/methanol, showing a central molecule (red) and its twelve hydrogen-bonded neighbors (blue and green). Six of the neighbors (blue) lie approximately in the plane of the central molecule (red) and form hydrogen bonds to it via motif **I**, thereby defining a sheet. Of the other six neighbors (green), half lie above the sheet, half lie below, and all form hydrogen bonds of type **III** to the central molecule (red). Guests are omitted for clarity, and hydrogen bonds are represented by broken lines. (b) Detailed view of the central tecton (red) and its six coplanar hydrogen-bonded neighbors (blue). (c) Detailed view of hydrogen bonding between the central molecule (red) and one of the six neighbors in adjacent sheets (green).

**Table S4.** Bond lengths [Å] and angles [°] related to the hydrogen bonding observed in crystals of tecton **4** grown from formic acid/methanol.

| D-H        | ..A    | d(D-H) | d(H..A) | d(D..A)  | <DHA  |
|------------|--------|--------|---------|----------|-------|
| N(4)-H(4B) | N(1)#1 | 0.88   | 2.14    | 2.975(4) | 157.1 |
| N(5)-H(5B) | N(3)#2 | 0.88   | 2.21    | 3.079(3) | 167.2 |
| N(5)-H(5A) | N(2)#3 | 0.88   | 2.37    | 3.197(4) | 157.4 |

Symmetry transformations used to generate equivalent atoms:

#1  $-x+y-1/3, -x-2/3, z+1/3$  #2  $-x-1, -y-1, -z$  #3  $-y-2/3, x-y-1/3, z-1/3$

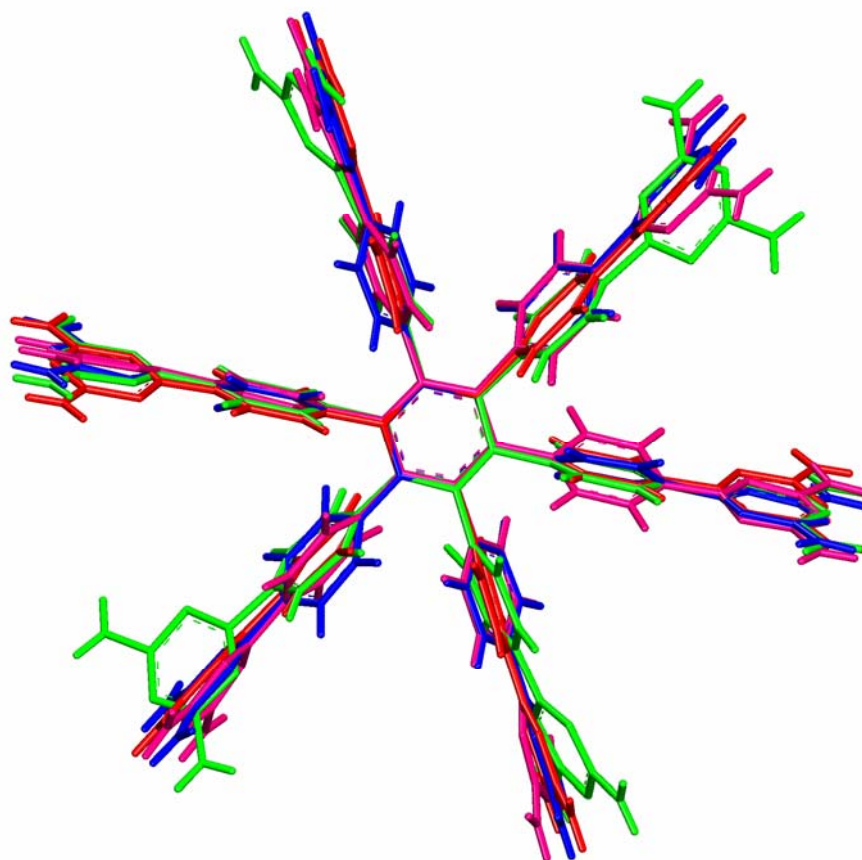

**Figure S7.** Overlay of the different conformers of compound **4** as observed in the structures of crystals grown from formic acid/methanol (red), DMSO/benzene (blue), DMSO/toluene (green), and DMSO/THF (pink). The molecular structures were aligned using the “Superpose Structures Tool” of MS Modeling 4.0.<sup>7</sup> The molecules were aligned using the RMS atom-fitting algorithm. In this procedure, the molecules are kept rigid, translated, and rotated to match in a way that minimizes the root-mean-square (RMS) distances between the equivalent atoms in the structures. RMS values are reported below:

| Solvent of crystallization | Color | RMS (Å <sup>2</sup> ) |
|----------------------------|-------|-----------------------|
| HCOOH/methanol             | Red   | 1.408                 |
| DMSO/benzene               | Blue  | 1.223                 |
| DMSO/toluene               | Green | 1.437                 |
| DMSO/THF                   | Pink  | 1.215                 |

## Crystal Structure of Tecton 6 Grown from DMSO/Acetone

The structure was solved by direct methods in the monoclinic space group  $C2/c$ . Only four DMSO solvent molecules were located, and they were refined using restraints on distances and angles. The contribution of the other solvent molecules was accounted for by using the PLATON/SQUEEZE procedure.<sup>6</sup> PLATON found 445 electrons compatible with approximately 16 acetone molecules in the unit cell (2 acetone molecules per asymmetric unit).

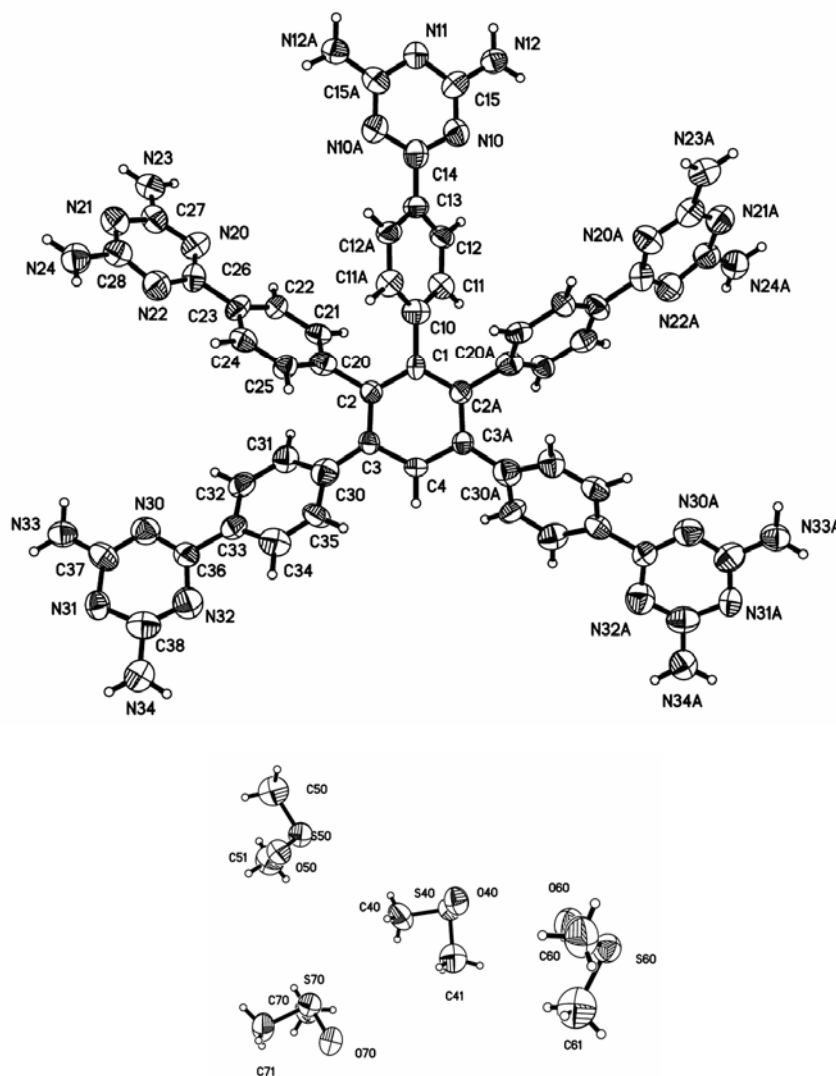

**Figure S8.** ORTEP view of the structure of crystals of tecton **6** grown from DMSO/acetone, with the numbering scheme adopted. Ellipsoids are drawn at the 30% probability level. Hydrogen atoms are represented by a sphere of arbitrary size.



**Table S5.** Bond lengths [ $\text{\AA}$ ] and angles [ $^\circ$ ] related to the hydrogen bonding observed in crystals of tecton **6** grown from DMSO/acetone.

| D-H          | ..A     | d(D-H) | d(H..A) | d(D..A)  | <DHA  |
|--------------|---------|--------|---------|----------|-------|
| N(12)-H(12A) | O(40)#1 | 0.88   | 2.27    | 3.151(6) | 174.4 |
| N(23)-H(23A) | O(60)#2 | 0.88   | 2.20    | 3.043(6) | 160.4 |
| N(23)-H(23B) | O(50)#3 | 0.88   | 1.98    | 2.849(6) | 170.9 |
| N(24)-H(24B) | O(60)#4 | 0.88   | 2.16    | 2.870(6) | 136.8 |
| N(24)-H(24A) | N(21)#5 | 0.88   | 2.08    | 2.844(7) | 144.4 |
| N(33)-H(33B) | O(60)#6 | 0.88   | 2.43    | 3.263(6) | 159.4 |
| N(34)-H(34A) | O(60)#7 | 0.88   | 2.06    | 2.820(6) | 144.0 |
| N(34)-H(34B) | N(31)#8 | 0.88   | 2.19    | 3.052(7) | 164.5 |

Symmetry transformations used to generate equivalent atoms:

|                            |                           |
|----------------------------|---------------------------|
| #1 $-x+1, -y+1, -z+1$      | #2 $-x+3/2, -y+3/2, -z+1$ |
| #2 $x+1, -y+1, z-1/2$      | #4 $x+1, y, z$            |
| #5 $-x+5/2, -y+3/2, -z+1$  | #6 $x+1, -y+2, z-1/2$     |
| #7 $-x+3/2, y+1/2, -z+3/2$ | #8 $-x+5/2, -y+5/2, -z+1$ |

## Crystal Structure of Tecton 5 Grown from DMSO/Acetonitrile

The selected crystal diffracted weakly, and useful data could be collected only up to  $\theta = 58.35^\circ$ . The structure was solved with direct methods in the monoclinic space group  $C2/c$  with the asymmetric unit containing one half of molecule of compound **5**. Some solvent molecules were found disordered and were refined with a combination of restraints on distances and angle while keeping the disordered parts similar (use of the SAME and SADI instructions<sup>3</sup>).

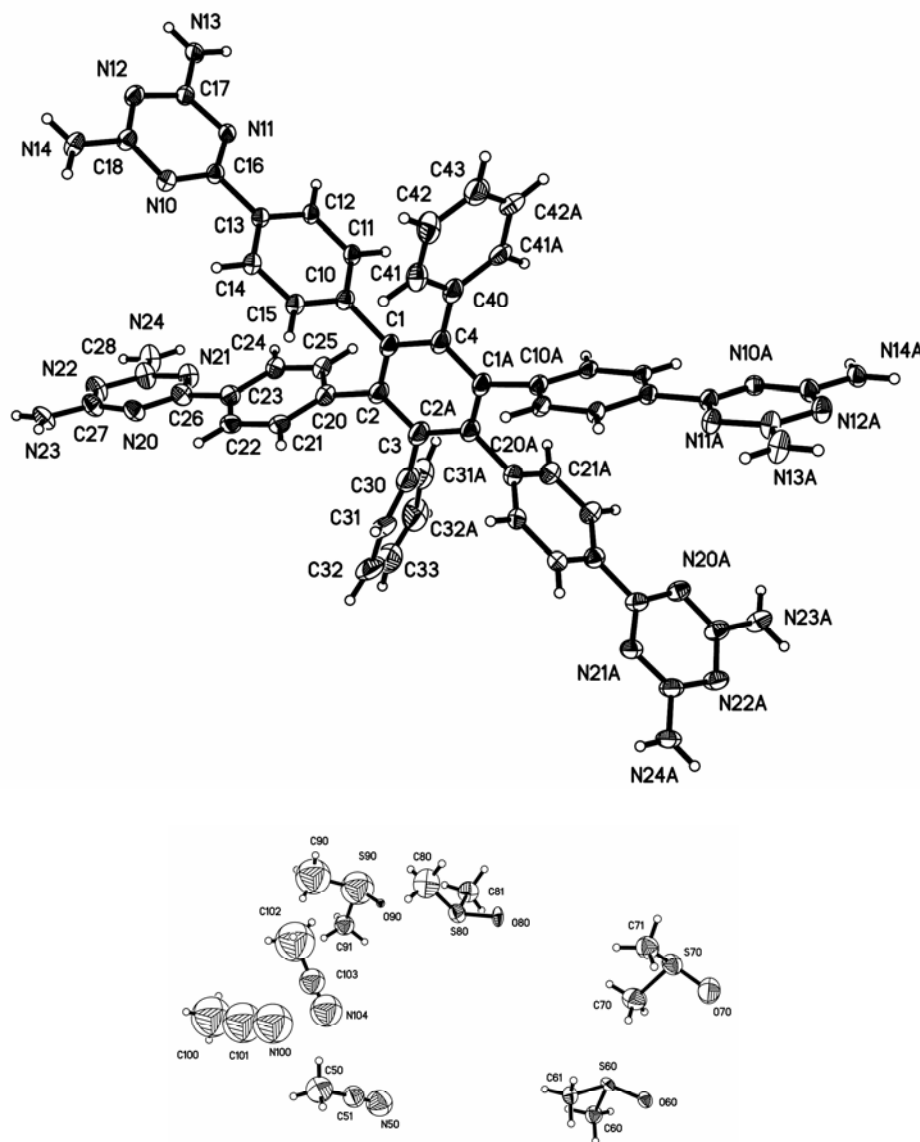

**Figure S9.** ORTEP view of the structure of crystals of tecton **5** grown from DMSO/acetonitrile, with the numbering scheme adopted. Ellipsoids are drawn at the 30% probability level. Only one part of the disordered solvent molecules is shown. Hydrogen atoms are represented by a sphere of arbitrary size.

## Crystal Structure of Tecton 7 Grown from DMSO/Methanol

The selected crystal diffracted weakly, and useful data could be collected only up to  $\theta = 58.9^\circ$ . The structure was solved with direct methods in the monoclinic space group  $P2_1/c$  with the asymmetric unit containing one whole molecule of compound **7** in general position. One arm of the molecule was found to be disordered over two positions.

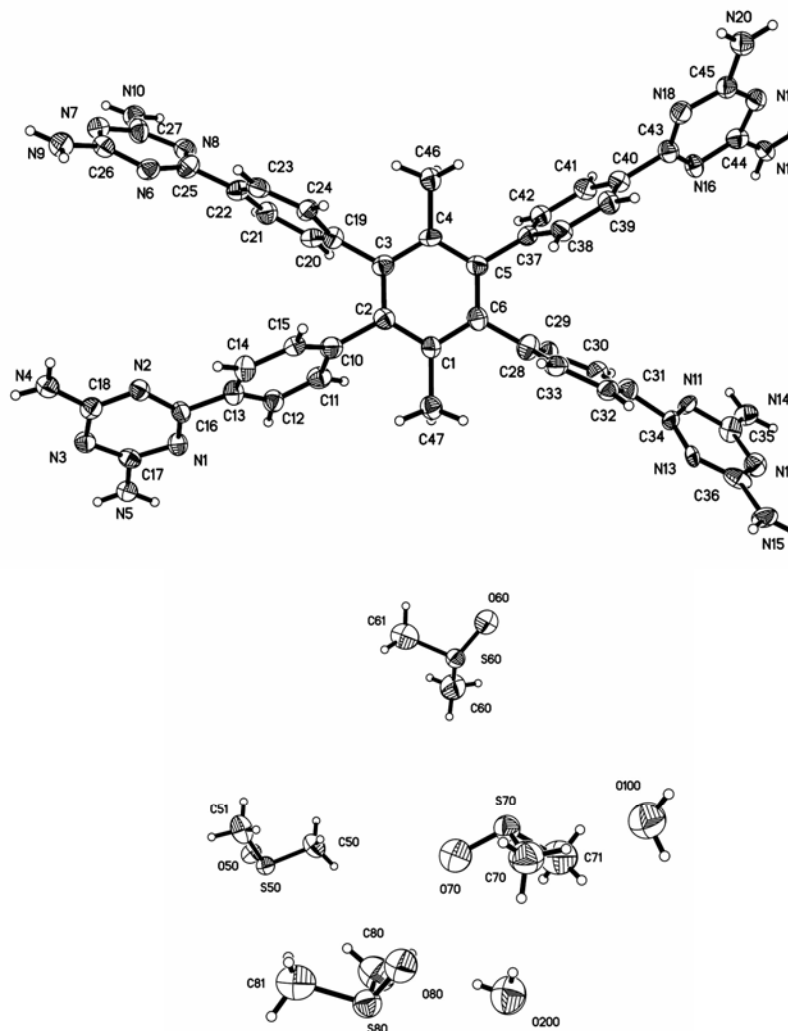

**Figure S10.** ORTEP view of the structure of crystals of tecton **7** grown from DMSO/methanol, with the numbering scheme adopted. Ellipsoids are drawn at the 30% probability level. Only one part of the disordered arm and the solvent molecules is shown. Hydrogen atoms are represented by a sphere of arbitrary size.

**Table S7.** Bond lengths [Å] and angles [°] related to the hydrogen bonding observed in crystals of tecton **7** grown from DMSO/methanol.

| D-H       | ..A     | d(D-H) | d(H..A) | d(D..A)  | <DHA  |
|-----------|---------|--------|---------|----------|-------|
| N9-H9A    | N7#1    | 0.88   | 2.61    | 3.30(9)  | 136.5 |
| N9-H9B    | N3#2    | 0.88   | 2.30    | 3.15(9)  | 163.5 |
| N10-H10A  | O60#3   | 0.88   | 2.08    | 2.91(9)  | 156.3 |
| N10-H10B  | O50#4   | 0.88   | 2.07    | 2.95(14) | 171.0 |
| N10-H10B  | O51#4   | 0.88   | 1.89    | 2.7(3)   | 160.0 |
| N14-H14B  | N17#5   | 0.88   | 2.30    | 3.13(15) | 155.5 |
| N15-H15B  | O80#6   | 0.88   | 2.00    | 2.67(12) | 132.0 |
| N14-H14A  | O80#7   | 0.88   | 2.78    | 3.41(16) | 129.5 |
| N14-H14B  | N17#5   | 0.88   | 2.30    | 3.13(15) | 155.5 |
| N15B-H15C | N12B#8  | 0.88   | 2.49    | 3.24(15) | 144.9 |
| N15B-H15D | O80#6   | 0.88   | 2.45    | 2.93(12) | 114.7 |
| N4-H4A    | O60#9   | 0.88   | 2.04    | 2.91(9)  | 170.8 |
| N4-H4B    | N5#2    | 0.88   | 2.98    | 3.68(9)  | 137.0 |
| N5-H5A    | N2#10   | 0.88   | 2.40    | 3.25(9)  | 164.1 |
| N5-H5B    | N6#10   | 0.88   | 2.23    | 3.07(9)  | 158.4 |
| N19-H19A  | N18#5   | 0.88   | 2.08    | 2.95(9)  | 168.7 |
| N19-H19B  | O70#11  | 0.88   | 2.57    | 3.18(9)  | 127.4 |
| N20-H20A  | N11B#12 | 0.88   | 2.62    | 3.29(10) | 134.3 |
| N20-H20B  | N16#12  | 0.88   | 2.30    | 3.16(10) | 166.0 |
| O100-H101 | O80#6   | 0.95   | 2.28    | 3.01(11) | 131.0 |
| O100-H102 | O200#6  | 0.95   | 2.61    | 3.50(6)  | 158.0 |
| O200-H202 | N15B#13 | 0.95   | 2.83    | 3.54(13) | 132.0 |

Symmetry transformations used to generate equivalent atoms:

|                         |                     |                        |
|-------------------------|---------------------|------------------------|
| #1 -x, -y+1, -z+3       | #2 x, -y+1/2, z+1/2 | #3 -x, y-1/2, -z+3/2   |
| #4 -x, -y+1, -z+1       | #5 x, -y+5/2, z-1/2 | #6 -x+1, y+1/2, -z+3/2 |
| #7 x, -y+3/2, z-1/2     | #8 -x+1, -y+2, -z+1 | #9 x, y-1, z+1         |
| #10 x, -y+1/2, z-1/2    | #11 x, y+1, z       | #12 x, -y+5/2, z+1/2   |
| #13 -x+1, y-1/2, -z+3/2 |                     |                        |

## Crystal Structure of Tecton 7 Grown from DMSO/Dioxane

The structure was solved with direct methods in the monoclinic space group  $C2/m$  with an asymmetric unit including one-half molecule of compound **7** on a mirror site. The selected crystal was found to be twinned. In addition, it diffracted weakly, and useful data could be collected only up to  $\theta = 56.3^\circ$ . Five DMSO molecules could be located, and a sixth DMSO molecule was found to be disordered over a mirror site and was modeled by using the PLATON/SQUEEZE procedure.<sup>6</sup>

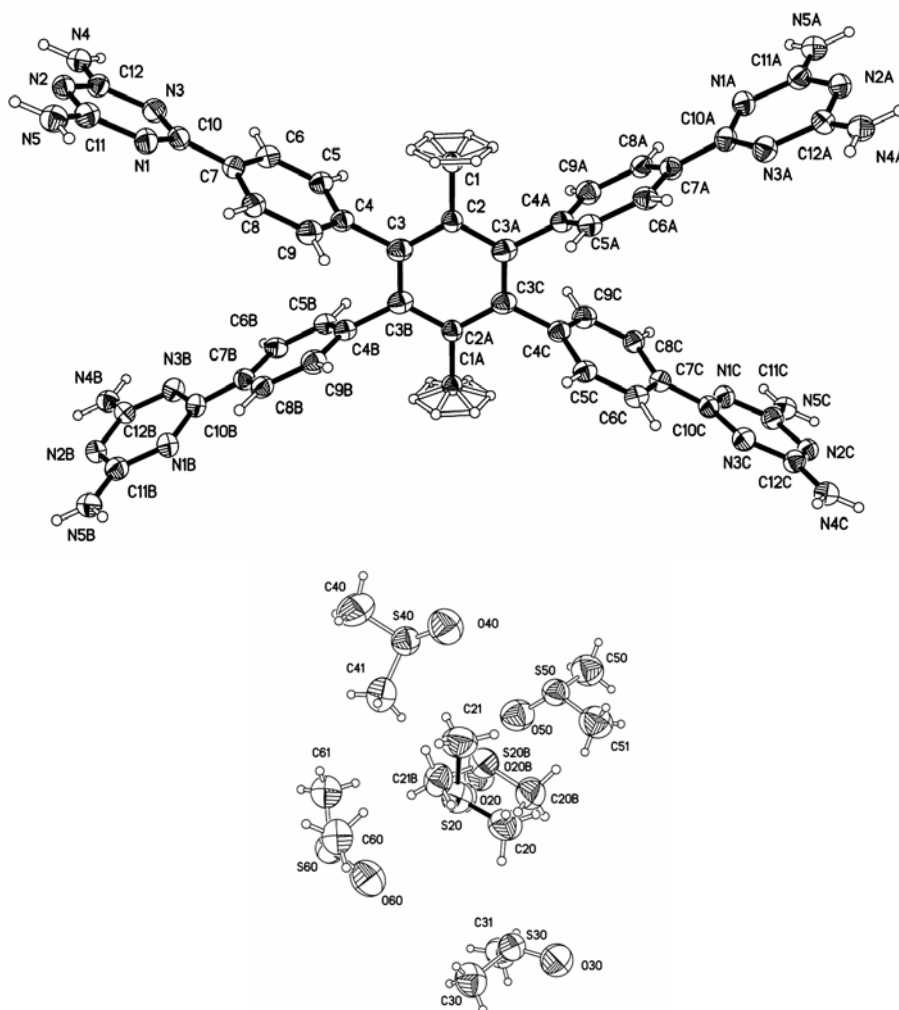

**Figure S11.** ORTEP view of the structure of crystals of tecton **7** grown from DMSO/dioxane, with the numbering scheme adopted. Ellipsoids are drawn at the 30% probability level. Hydrogen atoms are represented by a sphere of arbitrary size.

## Crystal Structure of Tecton 8 Grown from DMSO/Acetone

The structure was solved with direct methods in the monoclinic space group  $P2_1/c$  with an asymmetric unit including one-half molecule of compound **8**. Most of the included DMSO molecules are disordered and were refined using a combination of restraints on distances while keeping the disordered parts similar (use of the SAME and SADI instructions<sup>3</sup>). Hydrogen atoms were positioned geometrically with no attempt to optimize their positions (some hydrogen atom locations result in short contacts between different disordered parts).

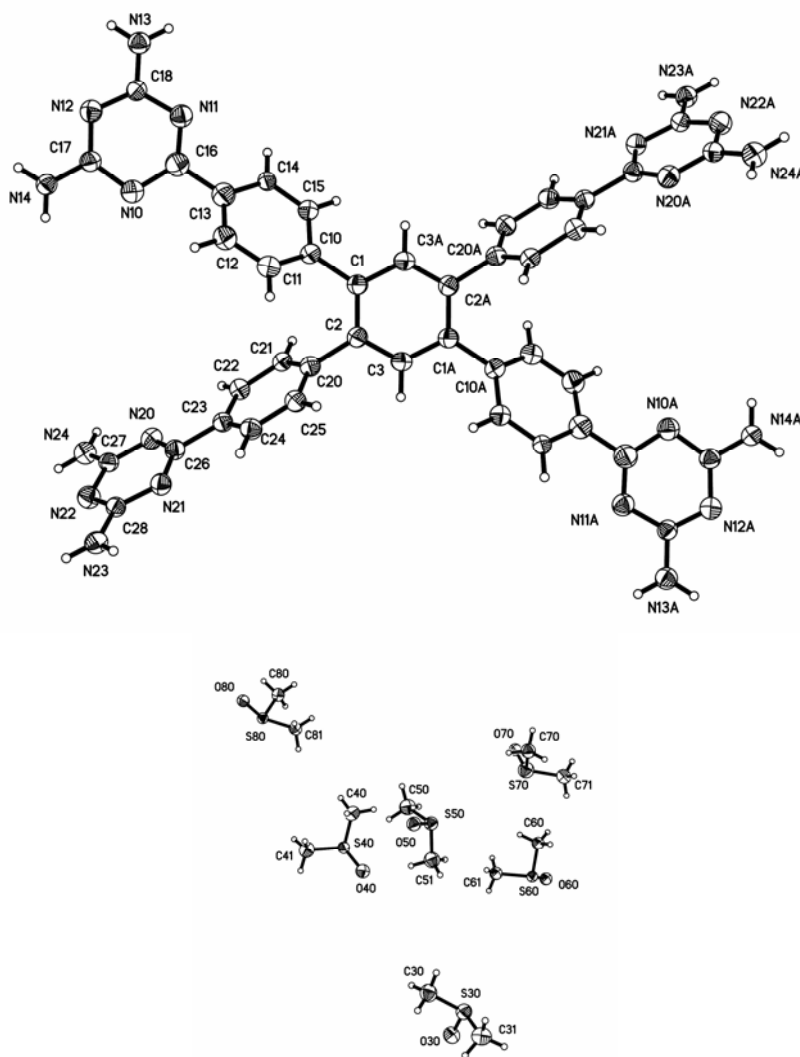

**Figure S12.** ORTEP view of the structure of crystals of tecton **8** grown from DMSO/acetone, with the numbering scheme adopted. Ellipsoids are drawn at the 30% probability level. Only one part of the disordered DMSO solvent molecules is shown. Hydrogen atoms are represented by a sphere of arbitrary size.

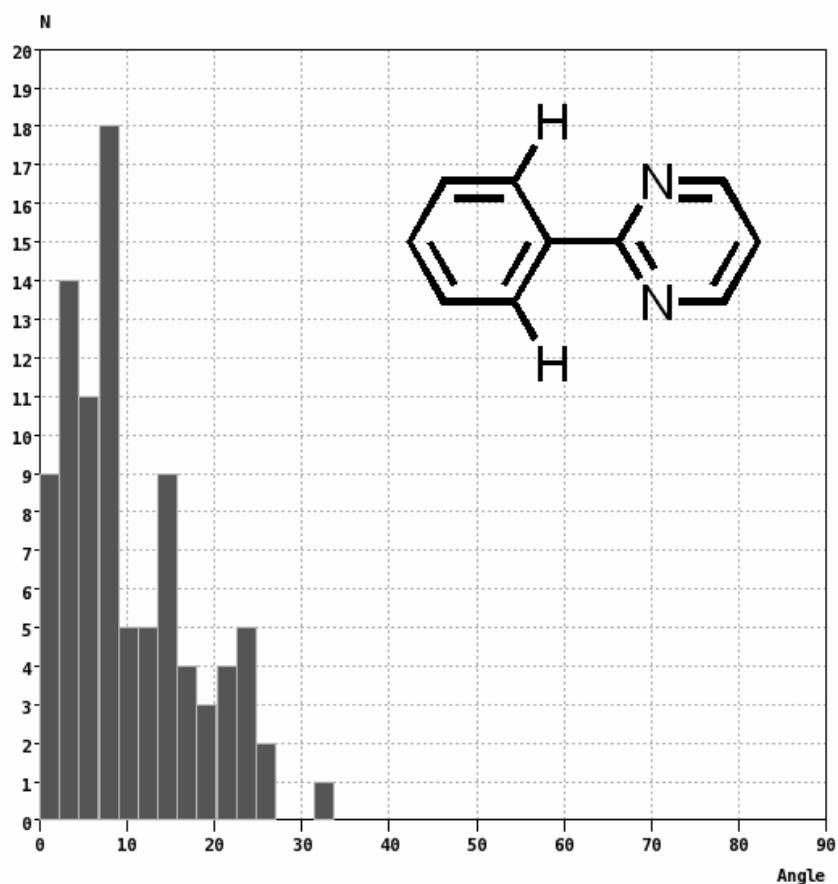

**Figure S13.** Histogram showing the frequency of torsional angles between the average planes of the aromatic rings in 2-phenylpyrimidines, as observed in crystal structures compiled in the Cambridge Structural Database (Version 5.27). Structures containing metals or with atoms other than hydrogen at the indicated positions were not included in the analysis to avoid torsional effects arising from coordination or from ortho substitution. In addition, phenylpyrimidines in which the atoms of nitrogen were protonated or otherwise substituted were removed individually from the set of data.

## References

- 1 SMART (2003). Version 5.630. Bruker Molecular Analysis Research Tools. Bruker AXS Inc., Madison, WI 53719-1173.
- 2 SAINT (2004). Release 7.01; Integration Software for Single-Crystal Data. Bruker AXS Inc., Madison, WI 53719-1173.
- 3 G. M. Sheldrick, *SHELXS-97, Program for the Solution of Crystal Structures* and *SHELXL-97, Program for the Refinement of Crystal Structures*, Universität Göttingen: Germany, 1997.
- 4 Sheldrick, G. M. (2004). SADABS, Bruker Area Detector Absorption Correction. Bruker AXS Inc., Madison, WI 53719-1173.
- 5 SHELXTL (1997) Release 6.14; The Complete Software Package for Single Crystal Structure Determination. Bruker AXS Inc., Madison, WI 53719-1173.
- 6 Spek, A. L. PLATON, A Multipurpose Crystallographic Tool; Utrecht University: Utrecht, The Netherlands, 2001. van der Sluis, P.; Spek, A. L. *Acta Crystallogr.* **1990**, A46, 194.
- 7 Accelrys (2005). MS Modeling 4.0, Accelrys Inc., 9685 Scranton Road, San Diego, CA 92121-2777, USA.
